# Supplementary material for: TIPA-ligand-based luminescent Cd(ii) organic frameworks as an outstanding sensor for detecting Fe3+ in an aqueous medium
Source: Royal Society of Chemistry journal article supplement (doi:10.1039/d1ce00499a), 2021-01-01
Supplement: d1ce00499a1.pdf [file d1ce00499a1.pdf]

**TIPA-ligand-based luminescent Cd(II) organic  
frameworks as an outstanding sensor for detecting  
Fe<sup>3+</sup> in aqueous medium**

Jian-Ling Ni, Yu Liang, Juan-Juan Shao, Jun-Feng Li, Guang-Jun Li, Li-Zhuang Chen and  
Fang-Ming Wang\*

*\*School of Environmental and Chemical Engineering, Jiangsu University of Science and  
Technology, Zhenjiang, Jiangsu 212003, China*

Supporting Information

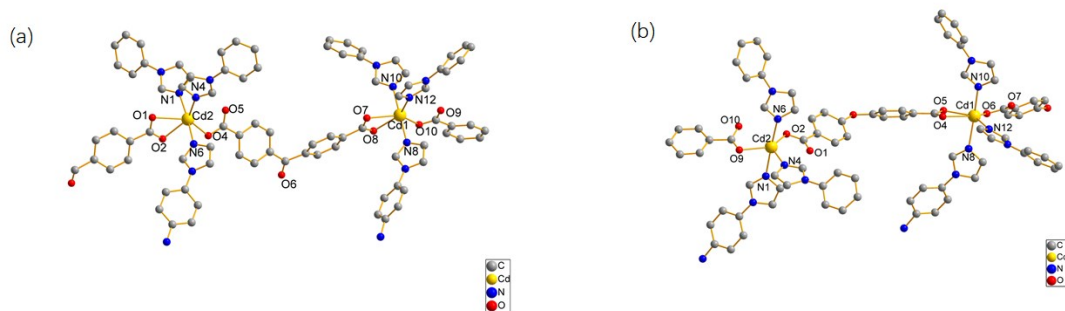

**Fig. S1.** (a) Coordination environment of MOF-1. (b) Coordination environment of MOF-2. The hydrogen atoms are omitted for clarity.

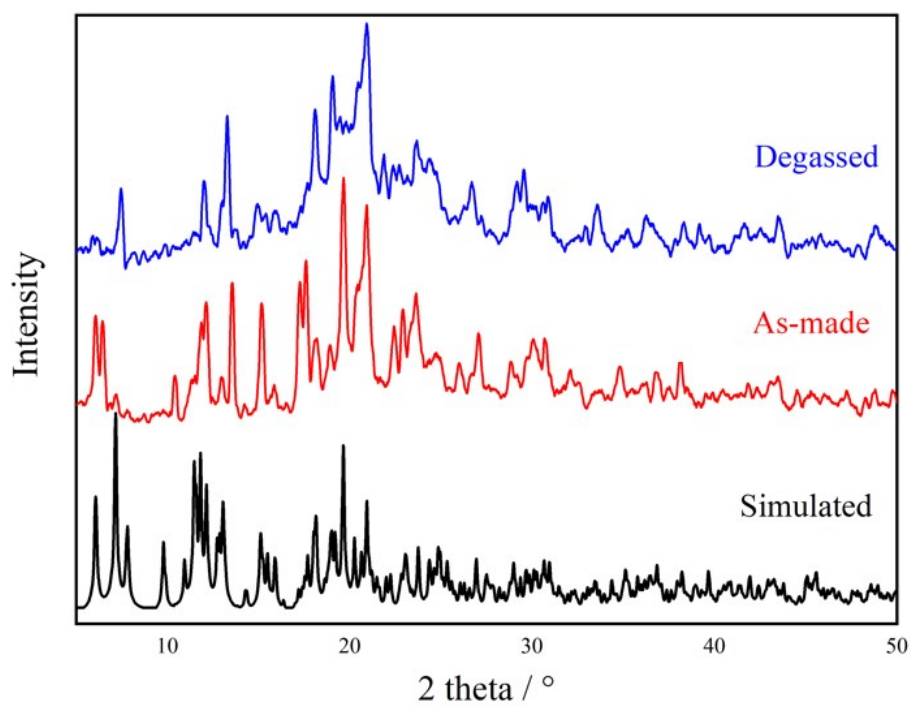

**Fig. S2.** PXRD patterns. From bottom to top: simulated 1, as made 1, degassed 1.

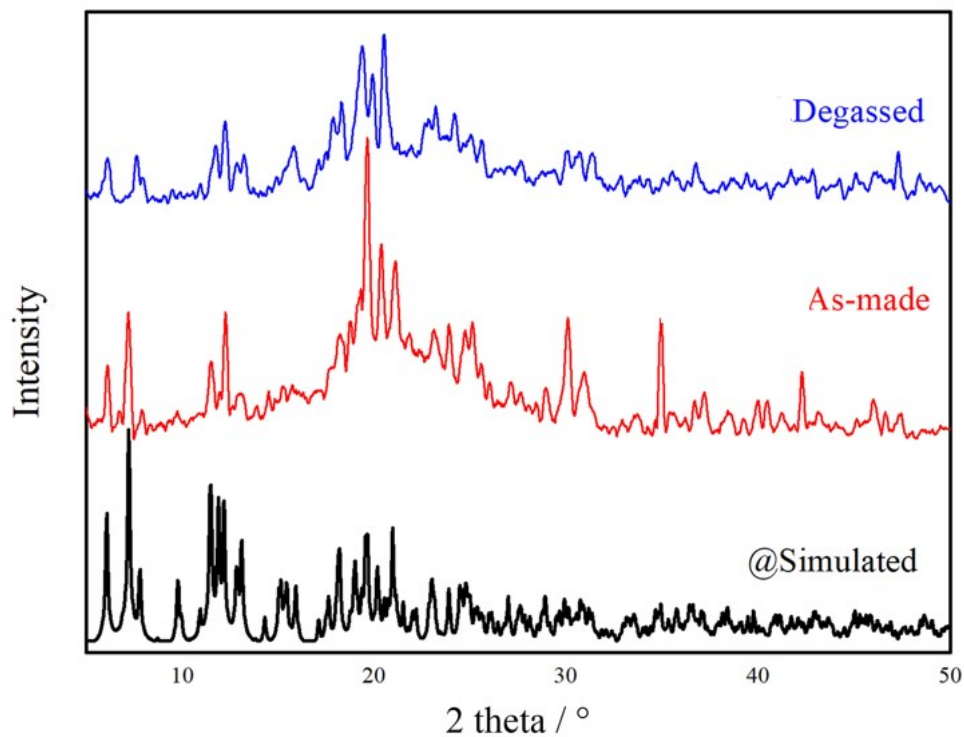

**Fig. S3.** PXRD patters. From bottom to top: simulated **2**, as made **2**, degassed **2**.

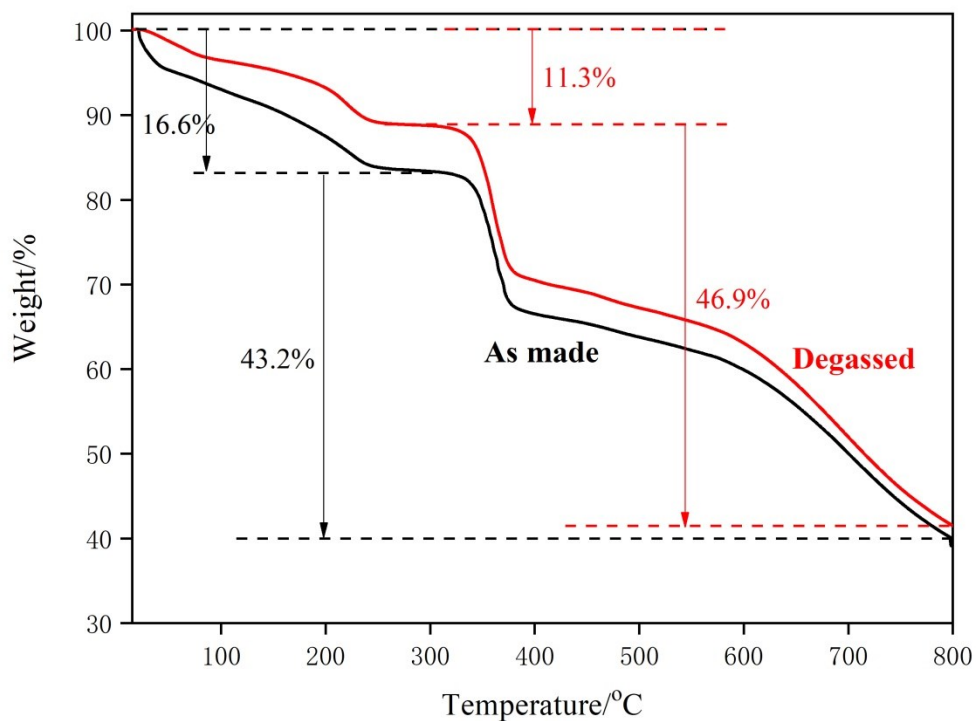

**Fig. S4.** TG profiles. From bottom to top: as made **1**, degassed **1**.

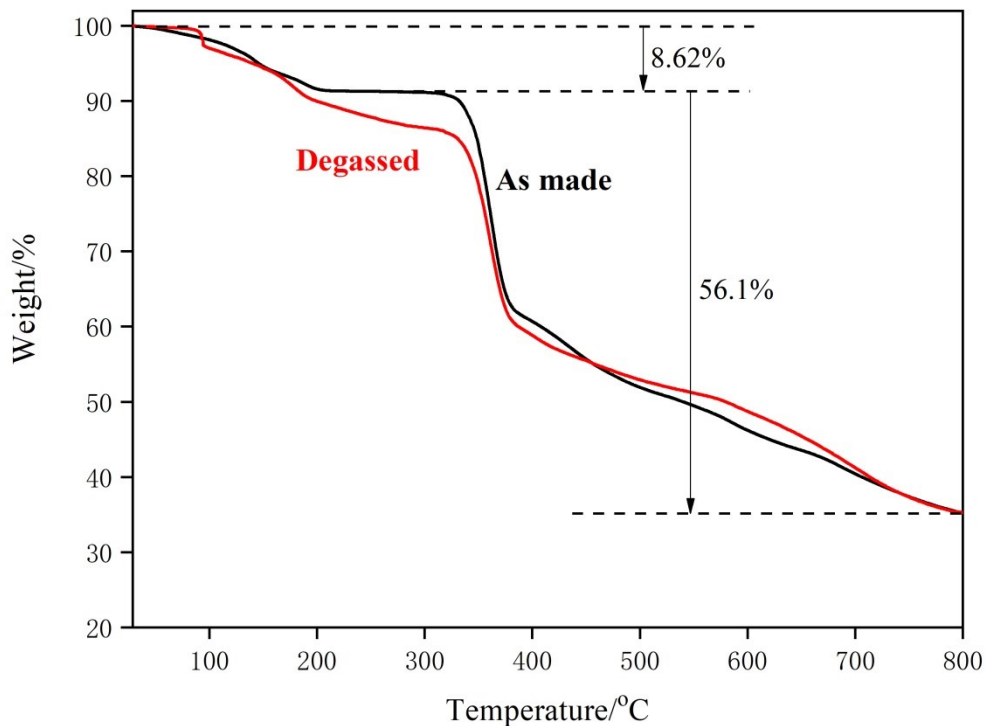

**Fig. S5.** TG profiles. From bottom to top: as made **2**, degassed **2**.

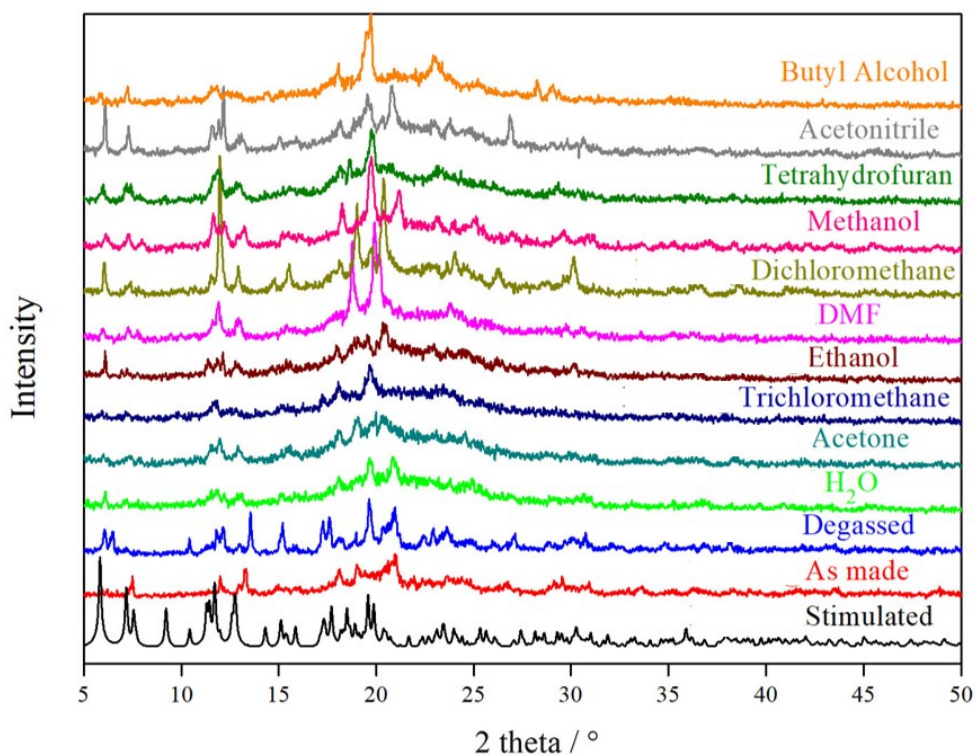

**Fig. S6.** The PXRD of MOF-1 soaked in the different solvents

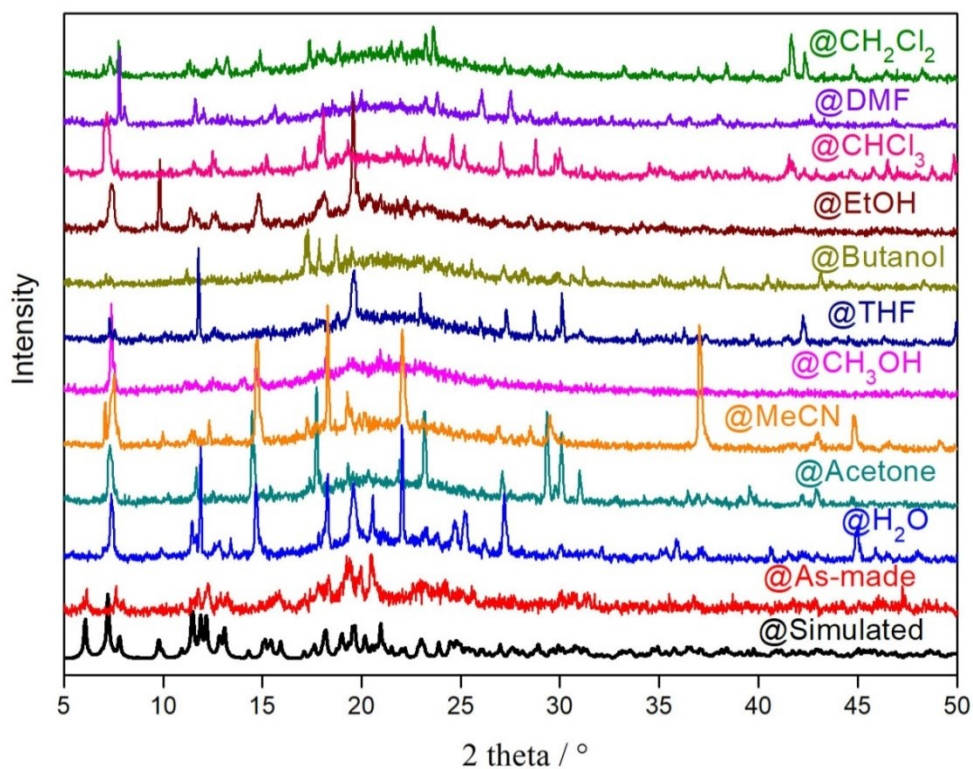

**Fig. S7.** The PXRD of MOF-2 soaked in the different solvent

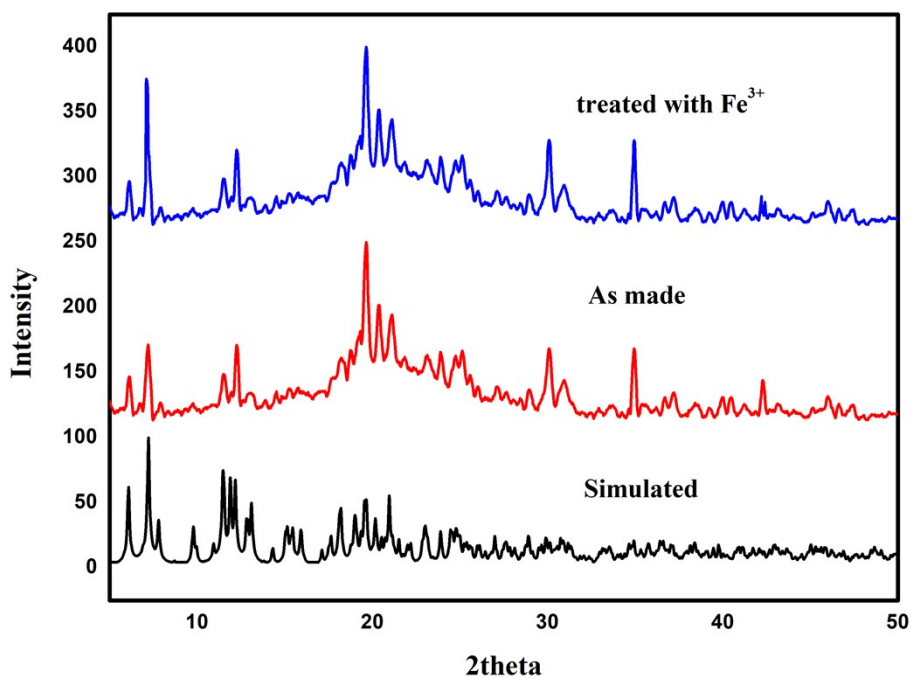

**Fig. S8.** PXRD patterns of simulated, as-made, 1 immersed in aqueous solution of Fe<sup>3+</sup>

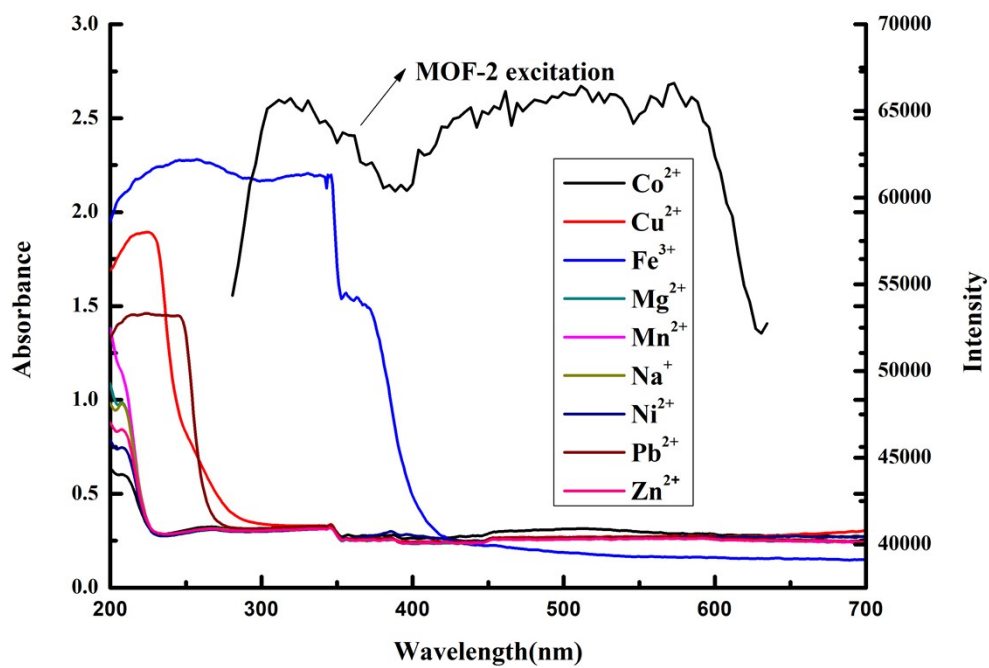

**Fig. S9.** The UV Vis spectra and fluorescence excitation spectra of aqueous solutions of MOF-2 of different metal ions
